# Supplementary material for: Identification of the initial nucleocapsid recognition element in the HIV-1 RNA packaging signal
Source: PubMed Central journal article supplement (PMC7395439; doi:10.1073/pnas.2008519117), 2020-07-09
Supplement: pnas.2008519117.sapp.pdf [file pnas.2008519117.sapp.pdf]

# SUPPLEMENTARY MATERIALS

## Identification of the initial nucleocapsid recognition element in the HIV-1 RNA packaging signal

Pengfei Ding<sup>a,b</sup>, Siarhei Kharytonchyk<sup>c</sup>, Alexis Waller<sup>a</sup>, Ugonna Mbaekwe<sup>a</sup>, Sapna Basappa<sup>a</sup>, Nansen Kuo<sup>a</sup>, Heather M. Frank<sup>a</sup>, Christina Quasney<sup>a</sup>, Aaron Kidane<sup>a</sup>, Canessa Swanson<sup>a</sup>, Verna Van<sup>a</sup>, Mitali Sarkar<sup>a</sup>, Emily Cannistraci<sup>a</sup>, Ridhi Chaudhary<sup>a</sup>, Hana Flores<sup>a</sup>, Alice Telesnitsky<sup>c,1</sup>, Michael F. Summers<sup>a,b,1</sup>

<sup>a</sup>Department of Chemistry and Biochemistry, University of Maryland Baltimore County, Baltimore, MD 21250;

<sup>b</sup>Howard Hughes Medical Institute, University of Maryland Baltimore County, Baltimore, MD 21250;

<sup>c</sup>Department of Microbiology and Immunology, University of Michigan Medical School, Ann Arbor, MI 48109

<sup>1</sup>To whom correspondence may be addressed. Email: [summers@hhmi.umbc.edu](mailto:summers@hhmi.umbc.edu) or [ateles@umich.edu](mailto:ateles@umich.edu)

**CONTENTS:**

**CONTAINS SIX FIGURES AND FIGURE CAPTIONS**

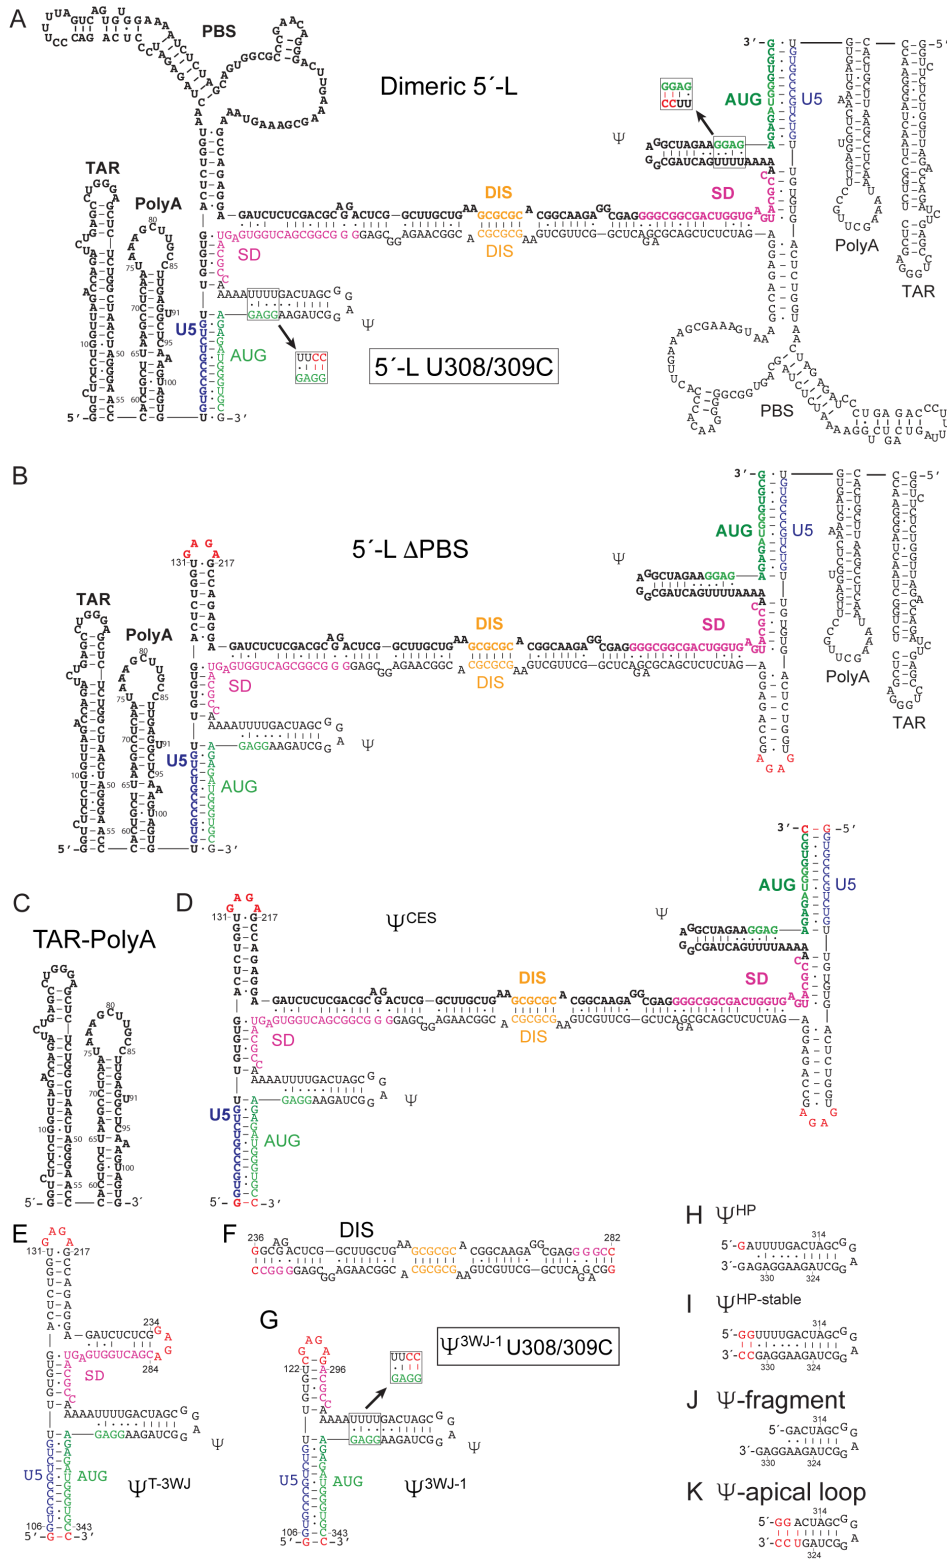

**Fig. S1.** Summary of all RNA constructs used in this study. Non-native residues are shown in red.

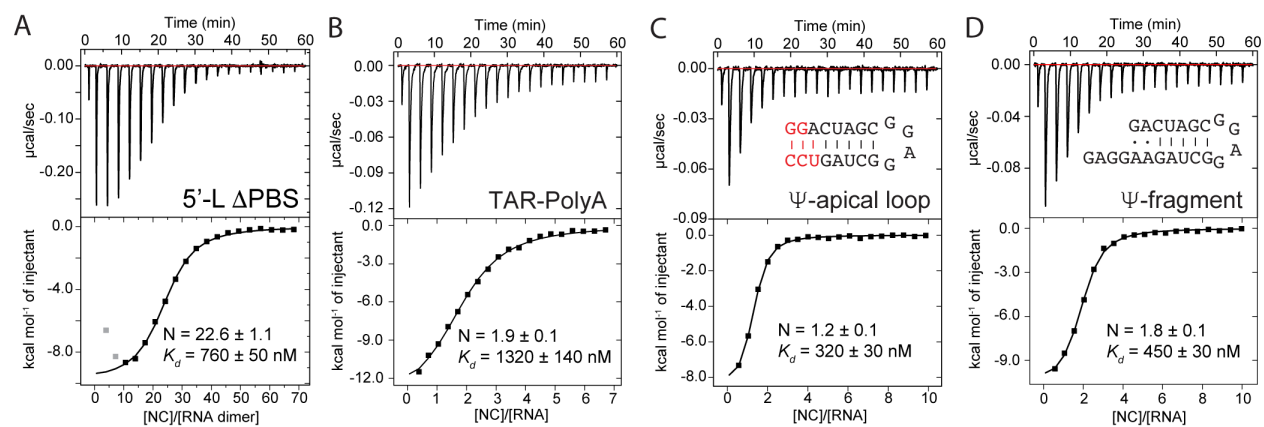

**Fig. S2.** ITC data of HIV-1 5'-L constructs. (A) 5'-L with the PBS region deleted. The gray data points due to endothermic binding were not included in data fitting. (B) TAR and PolyA hairpins; (C) the upper stem region and the apical loop from the Ψ-stem loop; (D) A construct with Ψ-apical loop and a single stranded “GGAG” region.

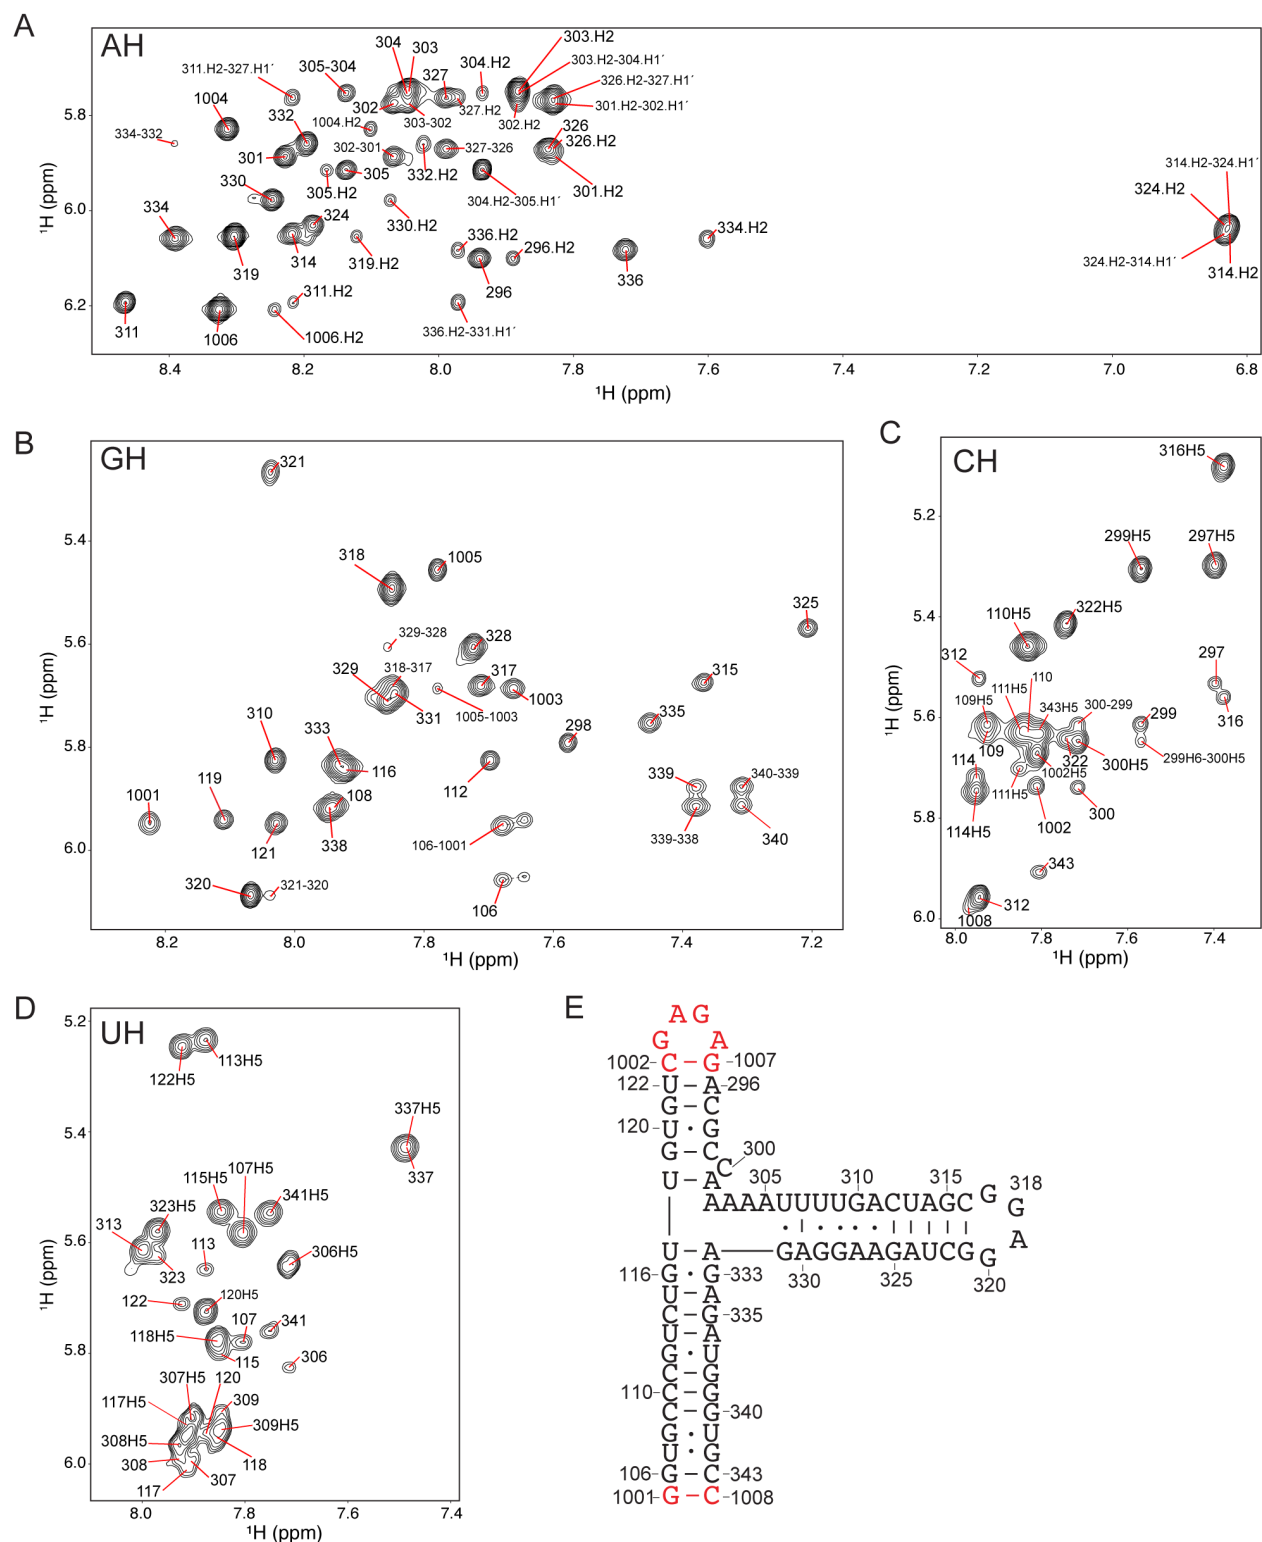

**Fig. S3.** Chemical shift assignments for  $\Psi^{3WJ-1}$ . For  $A^H$ - (A) and  $G^H$ - (B) spectra, intra-residue H8-H1' cross-peaks are denoted by residue number; inter-residue H8-H1' are indicated by (residue number of H8)-(residue number of H1'); Intra-residue H2-H1' are

shown by (residue number).H2; Inter-residue H2-H1' are labeled by (residue number of H2).H2-(residue number of H1').H1'. For C<sup>H</sup>- (C) and U<sup>H</sup>- (D) spectra, intra-residue H6-H1' cross-peaks are denoted by residue number; inter-residue H6-H1' are indicated by (residue number of H6)-(residue number of H1'); Intra-residue H6-H5 cross-peaks are labeled by (residue number).H5; Inter-residue H6-H5 cross-peaks are indicated by (residue number of H6).H6-(residue number of H5).H5. (E) Secondary structure of  $\Psi^{3WJ-1}$ . Non-native residues are shown in red and numbered 1001-1008.

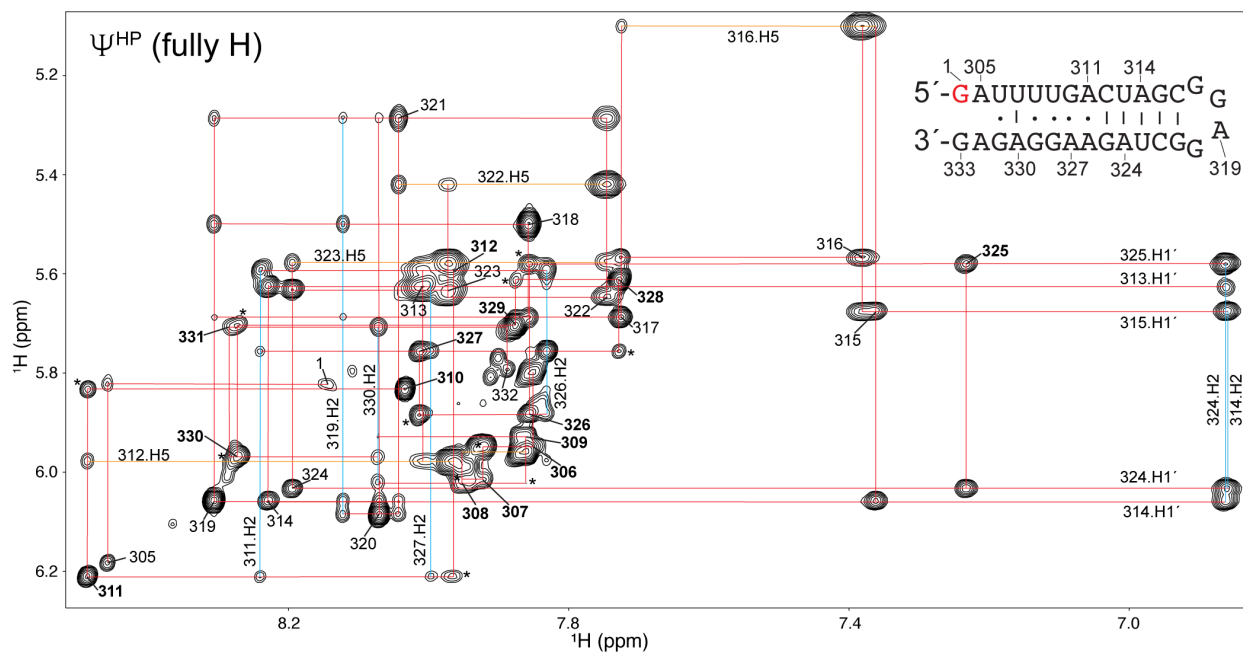

Fig. S4. Chemical shift assignments for  $\Psi^{HP}$ . Intra-residue H8/H6-H1' cross-peaks are denoted by residue number. Adenosine H2 signals are indicated by blue lines; Pyrimidine H5 signals are labeled by yellow lines. Sequential H8/H6-H1' cross-peaks for the [UUUUGAC]:[GAAGGAG] region are marked by stars.

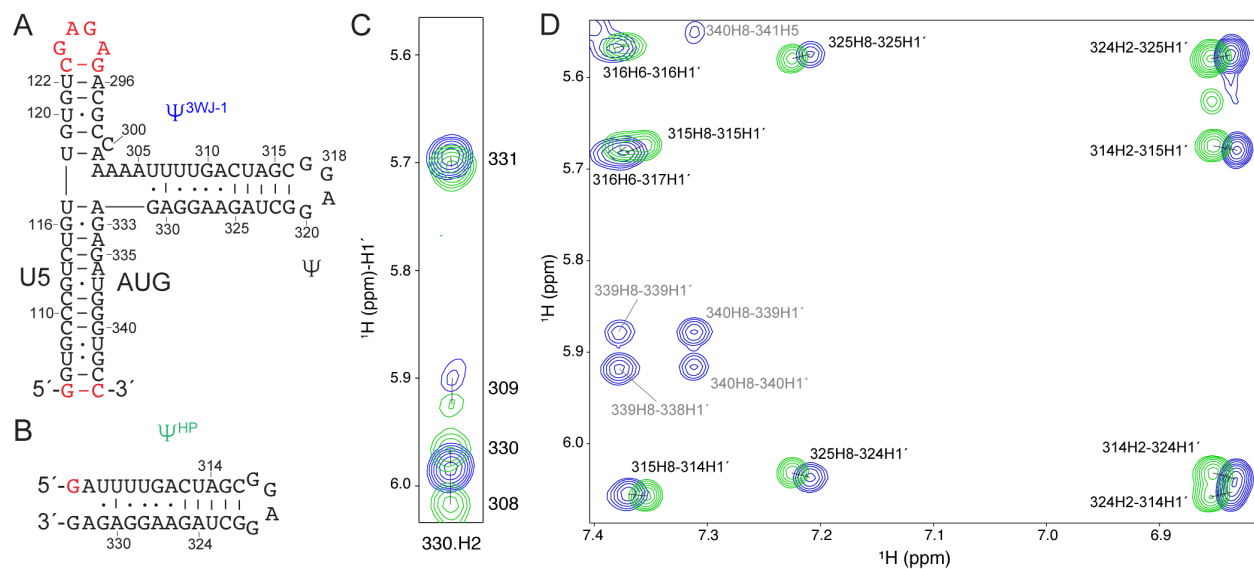

**Fig. S5.**  $\Psi^{HP}$  is structurally similar to the same region in  $\Psi^{3WJ-1}$ . Secondary structure of  $\Psi^{3WJ-1}$  (A) and  $\Psi^{HP}$  (B). Non-native residues are shown in red. (C) 2D NOESY spectra overly of fully protonated  $\Psi^{HP}$  (green) and  $A^{2r}G^rU^r$ -labeled  $\Psi^{3WJ-1}$  (blue). (D) 2D NOESY spectra overly of fully protonated  $\Psi^{HP}$  (green) and fully protonated  $\Psi^{3WJ-1}$  (blue).

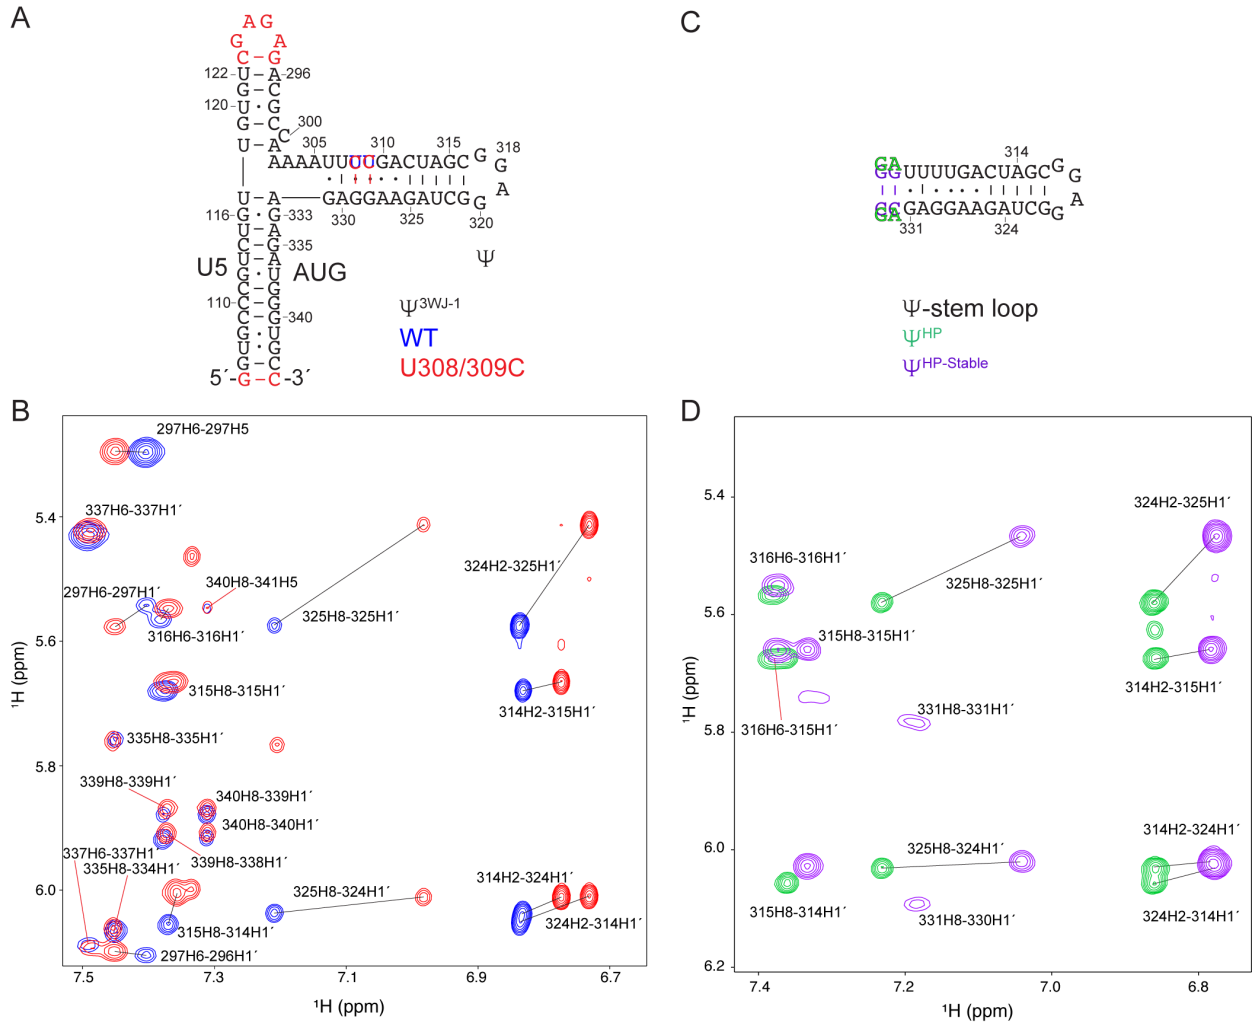

**Fig. S6.** Structural effects of stabilizing the [UUUU]:[GGAG] region. (A) Secondary structure of wild-type and G:U to G-C mutant of  $\Psi^{3WJ-1}$ . Non-native residues are shown in red. (B) 2D NOESY spectra overlay of fully protonated wild-type (blue) and G:U to G-C mutant (red)  $\Psi^{3WJ-1}$ . (C) Secondary structure of  $\Psi^{HP}$  and  $\Psi^{HP-stable}$ . (D) 2D NOESY spectra overlay of fully protonated  $\Psi^{HP}$  (green) and  $\Psi^{HP-stable}$  (purple).
